# Supplementary material for: Diet Quality through Adolescence and Early Adulthood: Cross-Sectional Associations of the Dietary Approaches to Stop Hypertension Diet Index and Component Food Groups with Age
Source: PubMed Central journal article supplement (PMC6265851; doi:10.3390/nu10111585), 2018-10-29
Supplement: nutrients-10-01585-s001.pdf [file nutrients-10-01585-s001.pdf]

**Table S1.** Scoring of the DASH index score.

| <b>Score Component</b>          | <b>Maximum Score</b> | <b>Requirement for Maximum Score</b> | <b>Requirement for Minimum Score (0)</b> |
|---------------------------------|----------------------|--------------------------------------|------------------------------------------|
| Fruit <sup>1</sup>              | 10                   | ≥4 servings/day                      | 0 servings/day                           |
| Vegetables <sup>2</sup>         | 10                   | ≥4 servings/day                      | 0 servings/day                           |
| Total Grains                    | 5                    | ≥6 servings/day                      | 0 servings/day                           |
| High-fiber grains               | 5                    | ≥50% daily grains servings           | 0% daily grains servings                 |
| Total Dairy                     | 5                    | ≥2 servings/day                      | 0 servings/day                           |
| Low-fat Dairy                   | 5                    | ≥75% daily dairy servings            | 0% daily dairy servings                  |
| Meat, poultry, fish, and eggs   | 10                   | ≤2 servings/day                      | ≥4 servings/day                          |
| Nuts, seeds, legumes, and beans | 10                   | ≥4 servings/week                     | 0 servings/week                          |
| Fats and oils                   | 10                   | ≤3 servings/day                      | ≥6 servings/day                          |
| Sweets                          | 10                   | ≤5 servings/week                     | ≥10 servings/week                        |
| <b>Maximum total score</b>      | <b>80</b>            |                                      |                                          |

Data are for 2000 kcal/day. Intakes between minimum and maximum levels were scored proportionally. <sup>1</sup> Fruit includes fruit juice. <sup>2</sup> Vegetables include potatoes.
